# Supplementary material for: Net clinical benefit of warfarin in individuals with atrial fibrillation across stroke risk and across primary and secondary care
Source: PubMed Central journal article supplement (PMC5284481; doi:10.1136/heartjnl-2016-309910), 2016-08-31
Supplement: heartjnl-2016-309910supp.pdf [file heartjnl-2016-309910supp.pdf]

## SUPPLEMENTARY MATERIAL

### **Net clinical benefit of warfarin in individuals with atrial fibrillation across stroke risk and across primary and secondary care.**

#### **Authors**

Victoria Allan<sup>1</sup> Amitava Banerjee<sup>1</sup> Anoop Dinesh Shah<sup>1</sup> Riyaz Patel<sup>1</sup> Spiros Denaxas<sup>1</sup>  
Juan-Pablo Casas<sup>1</sup> Harry Hemingway

#### **Affiliations**

<sup>1</sup> Farr Institute of Health Informatics Research, Institute of Health Informatics, University College London, London, United Kingdom.

## Contents

|                                                                                                                             |    |
|-----------------------------------------------------------------------------------------------------------------------------|----|
| <b>Table S1.</b> Phenotype definition to exclude valvular atrial fibrillation .....                                         | 3  |
| <b>Table S2.</b> CHA <sub>2</sub> DS <sub>2</sub> -VASc risk factors in individuals with and without use of warfarin.....   | 5  |
| <b>Table S3.</b> CHA <sub>2</sub> DS <sub>2</sub> -VASc risk factors in men and women.....                                  | 6  |
| <b>Table S4.</b> CHA <sub>2</sub> DS <sub>2</sub> -VASc risk factor completeness in primary and secondary care records..... | 7  |
| <b>Figure S1.</b> CHA <sub>2</sub> DS <sub>2</sub> -VASc risk factor completeness visualised in Venn diagrams .....         | 8  |
| <b>Table S5.</b> CHA <sub>2</sub> DS <sub>2</sub> -VASc scores calculated using primary and secondary care records.....     | 9  |
| <b>Table S6.</b> Propensity score adjusted incidence rates .....                                                            | 10 |
| <b>Table S7.</b> Supplementary evidence table comparing incidence rates in previous studies.....                            | 11 |
| <b>Table S8.</b> Sensitivity analyses in men with CHA <sub>2</sub> DS <sub>2</sub> -VASc=1 .....                            | 12 |
| <b>Table S9.</b> Relative risks in direct oral anticoagulant trials .....                                                   | 13 |
| <b>Table S10.</b> Net clinical benefit of direct oral anticoagulants.....                                                   | 14 |
| <b>Supplemental references</b> .....                                                                                        | 16 |

**Table S1.** Phenotype definition for valvular disease, which includes 45 Read codes, 9 International Classification of Diseases (ICD) codes, and 11 operation and procedure (OPCS) codes for mitral valve disease, rheumatic mitral regurgitation and prosthetic mitral, aortic or unspecified valve replacements.

| <b>Coding System</b> | <b>Code</b> | <b>Description</b>                                        |
|----------------------|-------------|-----------------------------------------------------------|
| Read (medcode)       | 1267        | Mitral valve diseases                                     |
| Read (medcode)       | 1756        | Replacement of aortic valve                               |
| Read (medcode)       | 1885        | Mitral stenosis                                           |
| Read (medcode)       | 3731        | Replacement of mitral valve NEC                           |
| Read (medcode)       | 3911        | Replacement of mitral valve                               |
| Read (medcode)       | 5643        | Replacement of valve of heart NEC                         |
| Read (medcode)       | 6631        | H/O: heart valve recipient                                |
| Read (medcode)       | 7276        | Prosthetic replacement of valve of heart NEC              |
| Read (medcode)       | 7894        | Plastic repair of mitral valve                            |
| Read (medcode)       | 8274        | Mitral and aortic stenosis                                |
| Read (medcode)       | 10078       | Diseases of mitral and aortic valves                      |
| Read (medcode)       | 15133       | Replacement of aortic valve NEC                           |
| Read (medcode)       | 16545       | Rheumatic mitral valve disease                            |
| Read (medcode)       | 17257       | Revision of plastic repair of mitral valve                |
| Read (medcode)       | 17334       | H/O: artificial heart valve                               |
| Read (medcode)       | 17596       | Mitral stenosis and aortic regurgitation                  |
| Read (medcode)       | 17812       | Open mitral valvotomy                                     |
| Read (medcode)       | 18475       | Combined disorders of mitral, aortic and tricuspid valves |
| Read (medcode)       | 19246       | Closed mitral valvotomy                                   |
| Read (medcode)       | 19390       | Prosthetic replacement of mitral valve                    |
| Read (medcode)       | 19699       | Disorders of both mitral and tricuspid valves             |
| Read (medcode)       | 21807       | Mitral incompetence - rheumatic                           |
| Read (medcode)       | 22582       | Mitral valvuloplasty NEC                                  |
| Read (medcode)       | 22837       | Mitral regurgitation - rheumatic                          |
| Read (medcode)       | 24557       | Mitral valve disorders NOS                                |
| Read (medcode)       | 28662       | Nonrheumatic mitral valve stenosis                        |
| Read (medcode)       | 28871       | [V]Has artificial heart valve                             |
| Read (medcode)       | 29158       | Mitral and aortic valve disease NOS                       |
| Read (medcode)       | 29887       | Replacement of unspecified valve of heart                 |
| Read (medcode)       | 30443       | Mitral valve disease NOS                                  |
| Read (medcode)       | 30567       | Bjork-Shiley prosthetic replacement of mitral valve       |
| Read (medcode)       | 32435       | Rheumatic mitral stenosis                                 |
| Read (medcode)       | 35812       | Prosthetic replacement of aortic valve                    |

|                |       |                                                                      |
|----------------|-------|----------------------------------------------------------------------|
| Read (medcode) | 36638 | Mitral valvuloplasty                                                 |
| Read (medcode) | 40264 | [V]Presence of prosthetic heart valve                                |
| Read (medcode) | 41168 | Plastic repair of mitral valve NOS                                   |
| Read (medcode) | 44328 | Mitral stenosis with regurgitation                                   |
| Read (medcode) | 44488 | Mitral stenosis with insufficiency                                   |
| Read (medcode) | 49355 | Mitral stenosis and aortic insufficiency                             |
| Read (medcode) | 49592 | Carpentier prosthetic replacement of mitral valve                    |
| Read (medcode) | 51879 | Rheumatic mitral insufficiency                                       |
| Read (medcode) | 53696 | Percutaneous transluminal mitral valvotomy                           |
| Read (medcode) | 57091 | Congenital mitral stenosis                                           |
| Read (medcode) | 60957 | Other specified plastic repair of mitral valve                       |
| Read (medcode) | 61250 | Mitral stenosis and aortic incompetence                              |
| ICD            | I050  | Mitral stenosis, rheumatic                                           |
| ICD            | I051  | Rheumatic mitral insufficiency                                       |
| ICD            | I052  | Mitral stenosis with insufficiency, rheumatic                        |
| ICD            | I058  | Other mitral valve diseases, rheumatic                               |
| ICD            | I059  | Mitral valve disease unspecified, rheumatic                          |
| ICD            | I080  | Disorders of both mitral and aortic valves, rheumatic                |
| ICD            | I081  | Disorders of both mitral and tricuspid valves, rheumatic             |
| ICD            | I083  | Combined disorders of mitral, aortic and tricuspid valves, rheumatic |
| ICD            | I342  | Nonrheumatic mitral (valve) stenosis                                 |
| OPCS           | K023  | Implantation of prosthetic heart                                     |
| OPCS           | K253  | Prosthetic replacement of mitral valve                               |
| OPCS           | K254  | Replacement of mitral valve NEC                                      |
| OPCS           | K258  | Other specified plastic repair of mitral valve                       |
| OPCS           | K259  | Unspecified plastic repair of mitral valve                           |
| OPCS           | K263  | Prosthetic replacement of aortic valve                               |
| OPCS           | K264  | Replacement of aortic valve NEC                                      |
| OPCS           | K293  | Prosthetic replacement of valve of heart NEC                         |
| OPCS           | K294  | Replacement of valve of heart NEC                                    |
| OPCS           | K301  | Revision of plastic repair of mitral valve                           |
| OPCS           | K311  | Open mitral valvotomy                                                |

**Table S2.** Comparison of baseline CHA<sub>2</sub>DS<sub>2</sub>-VAsC risk factors in individuals with and without use of warfarin.

|                                                  | With warfarin |      | Without warfarin |      | Overall |      |
|--------------------------------------------------|---------------|------|------------------|------|---------|------|
| Number of individuals                            | 30 067        |      | 40 139           |      | 70 206  |      |
|                                                  | N             | %    | N                | %    | N       | %    |
| Congestive heart failure                         | 10400         | 25.9 | 7032             | 23.4 | 17432   | 24.8 |
| Hypertension                                     | 32641         | 81.3 | 25122            | 83.6 | 57763   | 82.3 |
| Diagnosis                                        | 23973         | 59.7 | 17916            | 59.6 | 41889   | 59.7 |
| Blood pressure medication                        | 28657         | 71.4 | 22486            | 74.8 | 51143   | 72.9 |
| Blood pressure measures                          | 22060         | 55.0 | 17550            | 58.4 | 39610   | 56.4 |
| Age ≥ 75 [2]                                     | 27235         | 67.9 | 14955            | 49.7 | 42190   | 60.1 |
| Diabetes                                         | 5746          | 14.3 | 4243             | 14.1 | 9989    | 14.2 |
| Stroke/TIA/systemic embolism [2]                 | 7506          | 18.7 | 5319             | 17.7 | 12825   | 18.3 |
| Vascular disease                                 | 7935          | 19.8 | 5897             | 19.6 | 13832   | 19.7 |
| Myocardial infarction                            | 5439          | 13.6 | 4146             | 13.8 | 9585    | 13.7 |
| Peripheral vascular disease                      | 3341          | 8.3  | 2362             | 7.9  | 5703    | 8.1  |
| Age 65 to 74                                     | 6975          | 17.4 | 9321             | 31.0 | 16296   | 23.2 |
| Sex Category [female]                            | 21618         | 63.0 | 12668            | 37.0 | 34286   | 48.8 |
| <b>CHA<sub>2</sub>DS<sub>2</sub>-VAsC scores</b> |               |      |                  |      |         |      |
| 0                                                | 1414          | 3.5  | 1072             | 3.6  | 2486    | 3.5  |
| 1                                                | 2786          | 6.9  | 2851             | 9.5  | 5637    | 8.0  |
| 2                                                | 4485          | 11.2 | 4854             | 16.1 | 9339    | 13.3 |
| 3                                                | 7309          | 18.2 | 6461             | 21.5 | 13770   | 19.6 |
| 4                                                | 10102         | 25.2 | 6808             | 22.6 | 16910   | 24.1 |
| 5                                                | 6994          | 17.4 | 4232             | 14.1 | 11226   | 16.0 |
| 6                                                | 4383          | 10.9 | 2389             | 8.0  | 6772    | 9.7  |
| 7                                                | 1995          | 5.0  | 1070             | 3.6  | 3065    | 4.4  |
| 8                                                | 566           | 1.4  | 297              | 1.0  | 863     | 1.2  |
| 9                                                | 105           | 0.3  | 33               | 0.1  | 138     | 0.2  |

**Table S3.** Comparison of baseline CHA<sub>2</sub>DS<sub>2</sub>-VASc risk factors in men and women.

|                                                  | Men           |          | Women         |          | Overall       |          |
|--------------------------------------------------|---------------|----------|---------------|----------|---------------|----------|
| <b>Number of individuals</b>                     | <b>35 920</b> |          | <b>34 286</b> |          | <b>70 206</b> |          |
|                                                  | <b>N</b>      | <b>%</b> | <b>N</b>      | <b>%</b> | <b>N</b>      | <b>%</b> |
| <b>Congestive heart failure</b>                  | 8458          | 23.6     | 8974          | 26.2     | 17432         | 24.8     |
| <b>Hypertension</b>                              | 28350         | 78.9     | 29413         | 85.8     | 57763         | 82.3     |
| Diagnosis                                        | 19702         | 54.9     | 22187         | 64.7     | 41889         | 59.7     |
| Blood pressure medication                        | 24784         | 69       | 26359         | 76.9     | 51143         | 72.9     |
| Blood pressure measures                          | 18794         | 52.3     | 20816         | 60.7     | 39610         | 56.4     |
| <b>Age ≥ 75 [2]</b>                              | 17828         | 49.6     | 24362         | 71.1     | 42190         | 60.1     |
| <b>Diabetes</b>                                  | 5545          | 15.4     | 4444          | 13.0     | 9989          | 14.2     |
| <b>Stroke/TIA/systemic embolism [2]</b>          | 6136          | 17.1     | 6689          | 19.5     | 12825         | 18.3     |
| <b>Vascular disease</b>                          | 8435          | 23.5     | 5397          | 15.7     | 13832         | 19.7     |
| Myocardial infarction                            | 6120          | 17.0     | 3465          | 10.1     | 9585          | 13.7     |
| Peripheral vascular disease                      | 3292          | 9.2      | 2411          | 7.0      | 5703          | 8.1      |
| <b>Age 65–74</b>                                 | 9861          | 27.5     | 6435          | 18.8     | 16296         | 23.2     |
| <b>Sex Category [female]</b>                     | 0             | 0.0      | 34286         | 100      | 34286         | 48.8     |
| <b>CHA<sub>2</sub>DS<sub>2</sub>-VASc scores</b> |               |          |               |          |               |          |
| 0                                                | 2486          | 6.9      | 0             | 0.0      | 2486          | 3.5      |
| 1                                                | 4690          | 13.1     | 947           | 2.8      | 5637          | 8.0      |
| 2                                                | 6813          | 19.0     | 2526          | 7.4      | 9339          | 13.3     |
| 3                                                | 8562          | 23.8     | 5208          | 15.2     | 13770         | 19.6     |
| 4                                                | 6279          | 17.5     | 10631         | 31.0     | 16910         | 24.1     |
| 5                                                | 4168          | 11.6     | 7058          | 20.6     | 11226         | 16.0     |
| 6                                                | 1991          | 5.5      | 4781          | 13.9     | 6772          | 9.7      |
| 7                                                | 775           | 2.2      | 2290          | 6.7      | 3065          | 4.4      |
| 8                                                | 156           | 0.4      | 707           | 2.1      | 863           | 1.2      |
| 9                                                | 0             | 0.0      | 138           | 0.4      | 138           | 0.2      |

**Table S4.** Completeness of recording CHA<sub>2</sub>DS<sub>2</sub>-VASc risk factors in primary care records, and secondary care records.

|                                 | Total individuals with risk factor | Individuals with risk factor recorded in primary care |      | Individuals with risk factor recorded in secondary care |      |
|---------------------------------|------------------------------------|-------------------------------------------------------|------|---------------------------------------------------------|------|
|                                 | N                                  | N                                                     | %    | N                                                       | %    |
| Congestive heart failure        | 17432                              | 12043                                                 | 69.1 | 11145                                                   | 63.9 |
| Hypertension                    | 57763                              | 57197                                                 | 99.0 | 23310                                                   | 40.4 |
| Diabetes mellitus               | 9989                               | 9339                                                  | 93.5 | 7366                                                    | 73.7 |
| Stroke/ TIA / systemic embolism | 12825                              | 10671                                                 | 83.2 | 6171                                                    | 48.1 |
| Vascular disease                | 13832                              | 11956                                                 | 86.4 | 6419                                                    | 46.4 |

### Legend

Total individuals with risk factor refers to total number of individuals with recorded diagnosis of the risk factor, as recorded in either primary or secondary care records. Individuals with risk factor recorded in primary care refers to the 'completeness' of recording the risk factor in primary records, where 100% indicates absolute completeness. For example 99% of total individuals with hypertension, had a record of hypertension in primary care records. Individuals with risk factor recorded in secondary care refers to the 'completeness' of recording the risk factor in secondary records.

**Figure S1.** Venn diagrams comparing numbers of CHA<sub>2</sub>DS<sub>2</sub>-VASc risk factors captured in primary care, secondary care and in both sources linked. Venn circles are scaled according to the proportion of individuals that they represent.

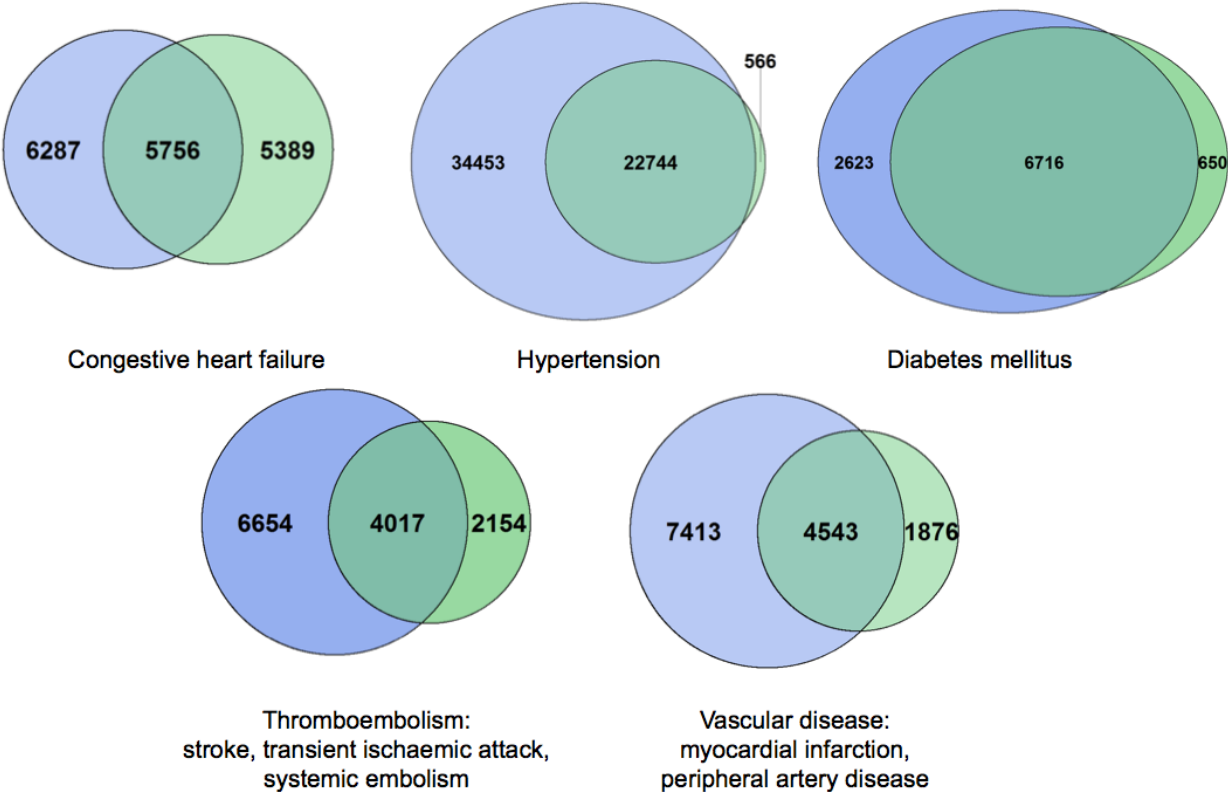



**Table S5.** CHA<sub>2</sub>DS<sub>2</sub>-VASc scores based on primary and secondary care records, compared to both data sources linked.

|                                                                       | <b>Secondary care records only</b> |          | <b>Primary–secondary care records</b> |          |
|-----------------------------------------------------------------------|------------------------------------|----------|---------------------------------------|----------|
| <b>Individuals with initial record of diagnosis in secondary care</b> | <b>40 638</b>                      |          | <b>40 638</b>                         |          |
| <b>CHA<sub>2</sub>DS<sub>2</sub>-VASc scores</b>                      | <b>N</b>                           | <b>%</b> | <b>N</b>                              | <b>%</b> |
| 0                                                                     | 2156                               | 5.3      | 1181                                  | 2.9      |
| 1                                                                     | 4042                               | 10.0     | 2665                                  | 6.6      |
| 2                                                                     | 7196                               | 17.7     | 4519                                  | 11.1     |
| 3                                                                     | 10309                              | 25.4     | 7107                                  | 17.5     |
| 4                                                                     | 8,768                              | 21.6     | 9578                                  | 23.6     |
| 5                                                                     | 4,794                              | 11.8     | 7514                                  | 18.5     |
| 6                                                                     | 2,361                              | 5.8      | 4906                                  | 12.1     |
| 7                                                                     | 776                                | 1.9      | 2341                                  | 5.8      |
| 8                                                                     | 201                                | 0.5      | 707                                   | 1.7      |
| 9                                                                     | 35                                 | 0.1      | 120                                   | 0.3      |
|                                                                       | <b>Primary care records only</b>   |          | <b>Primary–secondary care records</b> |          |
| <b>Individuals with initial record of diagnosis in primary care</b>   | <b>29 568</b>                      |          | <b>29 568</b>                         |          |
| <b>CHA<sub>2</sub>DS<sub>2</sub>-VASc scores</b>                      | <b>N</b>                           | <b>%</b> | <b>N</b>                              | <b>%</b> |
| 0                                                                     | 1320                               | 4.5      | 1305                                  | 4.4      |
| 1                                                                     | 3041                               | 10.3     | 2972                                  | 10.1     |
| 2                                                                     | 4889                               | 16.5     | 4820                                  | 16.3     |
| 3                                                                     | 6838                               | 23.1     | 6663                                  | 22.5     |
| 4                                                                     | 7450                               | 25.2     | 7332                                  | 24.8     |
| 5                                                                     | 3537                               | 12.0     | 3712                                  | 12.6     |
| 6                                                                     | 1750                               | 5.9      | 1866                                  | 6.3      |
| 7                                                                     | 611                                | 2.1      | 724                                   | 2.5      |
| 8                                                                     | 121                                | 0.4      | 156                                   | 0.5      |
| 9                                                                     | 11                                 | 0.0      | 18                                    | 0.1      |

**Table S6.** Propensity score adjusted incidence rates [95% confidence intervals] per 100 person-years of ischaemic stroke by CHA<sub>2</sub>DS<sub>2</sub>-VASC scores, sex, and use of warfarin

| CHA <sub>2</sub> DS <sub>2</sub> -VASC scores | With warfarin    |                | Without warfarin |                  | P-value |
|-----------------------------------------------|------------------|----------------|------------------|------------------|---------|
|                                               | Predicted events | Adjusted rate  | Predicted events | Adjusted rate    |         |
| <b>Overall population</b>                     |                  |                |                  |                  |         |
| 0                                             | 7                | 0.4 [0.1,0.7]  | 23               | 0.2 [0.1,0.3]    | 0.31    |
| 1                                             | 27               | 0.4 [0.3,0.6]  | 127              | 0.7 [0.6,0.8]    | 0.03    |
| 2                                             | 89               | 0.8 [0.6,1.0]  | 355              | 1.4 [1.2,1.5]    | 0.00    |
| 3                                             | 152              | 1.1 [0.9,1.3]  | 816              | 2.5 [2.3,2.6]    | 0.00    |
| 4                                             | 236              | 1.8 [1.6,2.0]  | 1366             | 3.8 [3.6,4.0]    | 0.00    |
| 5                                             | 236              | 3.2 [2.8,3.6]  | 1129             | 5.9 [5.6,6.2]    | 0.00    |
| 6                                             | 170              | 4.4 [3.7,5.1]  | 1154             | 11.6 [11.0,12.2] | 0.00    |
| 7                                             | 116              | 7.4 [6.1,8.8]  | 553              | 13.8 [12.7,14.8] | 0.00    |
| 8                                             | 19               | 5.0 [2.7,7.3]  | 167              | 17.6 [15.2,20.0] | 0.00    |
| 9                                             | 3                | 8.7 [0.4,16.9] | 30               | 24.9 [17.0,32.7] | 0.03    |
| <b>Men</b>                                    |                  |                |                  |                  |         |
| 0                                             | 7                | 0.4 [0.1,0.7]  | 23               | 0.2 [0.1,0.3]    | 0.31    |
| 1                                             | 25               | 0.4 [0.3,0.6]  | 110              | 0.7 [0.6,0.9]    | 0.02    |
| 2                                             | 78               | 0.9 [0.7,1.1]  | 306              | 1.7 [1.5,1.9]    | 0.00    |
| 3                                             | 114              | 1.4 [1.1,1.6]  | 542              | 2.9 [2.6,3.1]    | 0.00    |
| 4                                             | 171              | 3.2 [2.3,4.1]  | 552              | 4.8 [4.3,5.3]    | 0.00    |
| 5                                             | 153              | 5.1 [3.8,6.5]  | 580              | 9.2 [8.2,10.1]   | 0.00    |
| 6                                             | 74               | 5.9 [1.8,10.0] | 425              | 15.7 [13.5,17.9] | 0.00    |
| 7                                             | 39               | 9.1 [1.4,16.7] | 177              | 19.9 [15.5,24.3] | 0.00    |
| 8                                             | 1                | 1.1 [0.0,3.0]  | 28               | 20.6 [9.7,31.4]  | 0.00    |
| <b>Women</b>                                  |                  |                |                  |                  |         |
| 1                                             | 1                | 0.1 [0.0,0.4]  | 13               | 0.4 [0.1,0.7]    | 0.54    |
| 2                                             | 7                | 0.3 [0.1,0.4]  | 42               | 0.5 [0.3,0.6]    | 0.17    |
| 3                                             | 38               | 0.7 [0.5,0.9]  | 271              | 1.9 [1.7,2.2]    | 0.00    |
| 4                                             | 102              | 1.3 [1.1,1.6]  | 815              | 3.3 [3.1,3.5]    | 0.00    |
| 5                                             | 109              | 2.5 [2.0,2.9]  | 610              | 4.8 [4.4,5.2]    | 0.00    |
| 6                                             | 107              | 4.1 [3.3,4.9]  | 791              | 10.9 [10.2,11.7] | 0.00    |
| 7                                             | 82               | 7.3 [5.7,8.8]  | 397              | 12.7 [11.5,13.9] | 0.00    |
| 8                                             | 17               | 5.3 [2.8,7.7]  | 140              | 17.3 [14.8,19.9] | 0.00    |
| 9                                             | 3                | 8.7 [0.4,16.9] | 30               | 24.9 [17.0,32.7] | 0.03    |

**Legend:** Incidence rates were adjusted for propensity score quintiles. Propensity score was generated using a logistic regression model, which predicted probability of warfarin use (yes, no), based on CHA<sub>2</sub>DS<sub>2</sub>-VASC risk factors, age at initial record of diagnosis of atrial fibrillation, and source of initial record of atrial fibrillation (primary, or secondary care).

**Table S7.** Supplementary evidence table comparing studies that reported incidence rates for ischaemic stroke in atrial fibrillation patients with CHA<sub>2</sub>DS<sub>2</sub>-VASc=1 [including 1 in men | 2 in women], sorted by estimate size.

| Author, year         | Country        | Data source |    | Total patients | Maximum follow-up | Endpoints |    |    |    |     | Total events | Risk group                             |             | Incidence Rate [95% CI] per 100 PY |                      |      | Ref. |
|----------------------|----------------|-------------|----|----------------|-------------------|-----------|----|----|----|-----|--------------|----------------------------------------|-------------|------------------------------------|----------------------|------|------|
|                      |                | PC          | SC |                |                   | IS        | US | SE | PE | TIA |              | CHA <sub>2</sub> DS <sub>2</sub> -VASc | Sex         | Anticoagulants                     | No anticoagulants    |      |      |
| Huang, 2014          | China          | ○           | ●  | 358            | 4.5               | ●         | ○  | ○  | ○  | ○   | 70           | 1                                      | men         | NR [NR]                            | 6.60 [NR]            | [1]  |      |
| Chao, 2015           | Taiwan         | ○           | ●  | 12935          | 6.0               | ●         | ○  | ○  | ○  | ○   | 1858         | 1                                      | men         | NR [NR]                            | 2.75 [NR]            | [2]  |      |
| Chao, 2015           | Taiwan         | ○           | ●  | 7900           | 6.0               | ●         | ○  | ○  | ○  | ○   | 1174         | 2                                      | women       | NR [NR]                            | 2.55 [NR]            | [2]  |      |
| Olesen, 2011         | Denmark        | ○           | ●  | 8203           | 1.0               | ●         | ○  | ●  | ●  | ○   | NR           | 1                                      | both        | NR [NR]                            | 2.01 [1.70,2.36]     | [3]  |      |
| Olesen, 2012         | Denmark        | ○           | ●  | 10062          | 12.0              | ●         | ○  | ●  | ○  | ●   | 159          | 1                                      | both        | NR [NR]                            | 1.79 [1.53,2.09]     | [4]  |      |
| Olesen, 2011         | Denmark        | ○           | ●  | 14515          | 1.0               | ●         | ○  | ●  | ○  | ●   | 256          | 1                                      | both        | 1.28 [1.02,1.61]                   | 1.62 [1.37,1.92]     | [5]  |      |
| Lip, 2015            | Denmark        | ○           | ●  | 15860          | 1.0               | ●         | ○  | ●  | ○  | ○   | 188          | 1                                      | men         | 1.06 [NR]                          | 1.55 [NR]            | [6]  |      |
| Olesen, 2011         | Denmark        | ○           | ●  | 8203           | 5.0               | ●         | ○  | ●  | ●  | ○   | NR           | 1                                      | both        | NR [NR]                            | 1.51 [1.37,1.67]     | [3]  |      |
| Lip, 2015            | Denmark        | ○           | ●  | 15860          | 1.0               | ●         | ○  | ○  | ○  | ○   | 182          | 1                                      | men         | 1.02 [NR]                          | 1.50 [NR]            | [6]  |      |
| Olesen, 2011         | Denmark        | ○           | ●  | 8203           | 10.0              | ●         | ○  | ●  | ●  | ○   | NR           | 1                                      | both        | NR [NR]                            | 1.45 [1.32,1.58]     | [3]  |      |
| Olesen, 2012         | Denmark        | ○           | ●  | 10062          | 12.0              | ●         | ○  | ●  | ○  | ●   | 662          | 1                                      | both        | NR [NR]                            | 1.44 [1.34,1.56]     | [4]  |      |
| Lip, 2015            | Denmark        | ○           | ●  | 15860          | 4.5               | ●         | ○  | ●  | ○  | ○   | 987          | 1                                      | men         | 1.08 [NR]                          | 1.24 [NR]            | [6]  |      |
| Lip, 2015            | Denmark        | ○           | ●  | 15860          | 4.5               | ●         | ○  | ○  | ○  | ○   | 936          | 1                                      | men         | 1.02 [NR]                          | 1.18 [NR]            | [6]  |      |
| Friberg, 2012        | Sweden         | ○           | ●  | 6770           | 3.5               | ●         | ●  | ●  | ○  | ●   | NR           | 1                                      | both        | NR [NR]                            | 0.90 [NR]            | [7]  |      |
| Guo, 2012            | China          | ○           | ●  | 114            | 3.0               | ●         | ○  | ●  | ●  | ○   | NR           | 1                                      | both        | NR [NR]                            | 0.90 [NR]            | [8]  |      |
| <b>CALIBER, 2016</b> | <b>England</b> | ●           | ●  | <b>5637</b>    | <b>12.0</b>       | ●         | ●  | ●  | ●  | ●   | <b>153</b>   | <b>1</b>                               | <b>both</b> | <b>0.4 [0.3,0.7]</b>               | <b>0.7 [0.6,0.8]</b> |      |      |
| Lip, 2010            | Europe         | ○           | ●  | 162            | 1.0               | ●         | ○  | ●  | ●  | ○   | 1            | 1                                      | both        | NR [NR]                            | 0.60 [0.00,3.40]     | [9]  |      |
| Friberg, 2012        | Sweden         | ○           | ●  | 6770           | 3.5               | ●         | ○  | ○  | ○  | ○   | NR           | 1                                      | both        | NR [NR]                            | 0.60 [NR]            | [7]  |      |
| Friberg, 2015        | Sweden         | ○           | ●  | NR             | 5.0               | ●         | ○  | ○  | ○  | ○   | NR           | 1                                      | men         | NR [NR]                            | 0.50–0.70            | [10] |      |
| Forslund, 2014       | Sweden         | ●           | ●  | 6682           | 1.0               | ●         | ○  | ○  | ○  | ○   | NR           | ≤1                                     | both        | 0.00–0.30                          | 0.30–0.50            | [11] |      |
| Friberg, 2015        | Sweden         | ○           | ●  | NR             | 5.0               | ●         | ○  | ○  | ○  | ○   | NR           | 1                                      | women       | NR [NR]                            | 0.10–0.20            | [10] |      |

**Legend**

CI – confidence interval, PY – person-years, PC – primary care, SC – secondary care, IS - ischaemic stroke, US – unclassified stroke, SE – systemic embolism, PE – pulmonary embolism, TIA - transient ischaemic attack, NR – not reported, ○ – no, ● – yes. Example: Huang, 2014. utilised secondary care data for identifying patients, risk factors, and endpoints, and included ischaemic stroke in the endpoint definition.

**Table S8.** Sensitivity analyses in men with CHA<sub>2</sub>DS<sub>2</sub>-VASc=1.

|                                                                    | Total patients    | Initial AF diagnosis |    | CHA <sub>2</sub> DS <sub>2</sub> -VASc |    | Endpoint |    |    | Endpoint Definition |    |    |    |     | Total events | Incidence Rate [95% CI] per 100 PY |
|--------------------------------------------------------------------|-------------------|----------------------|----|----------------------------------------|----|----------|----|----|---------------------|----|----|----|-----|--------------|------------------------------------|
|                                                                    |                   | PC                   | SC | PC                                     | SC | PC       | SC | DR | IS                  | US | SE | PE | TIA |              |                                    |
| <b>By data source used for CHA<sub>2</sub>DS<sub>2</sub>-VASc:</b> |                   |                      |    |                                        |    |          |    |    |                     |    |    |    |     |              |                                    |
| Secondary care                                                     | 3015 <sup>a</sup> | ○                    | ●  | ○                                      | ●  | ●        | ●  | ●  | ●                   | ●  | ○  | ○  | ○   | 156          | 1.4 [1.2,1.6]                      |
| Primary care                                                       | 2563 <sup>a</sup> | ●                    | ○  | ●                                      | ○  | ●        | ●  | ●  | ●                   | ●  | ○  | ○  | ○   | 72           | 0.6 [0.5,0.8]                      |
| Total                                                              | 4690              | ●                    | ●  | ●                                      | ●  | ●        | ●  | ●  | ●                   | ●  | ○  | ○  | ○   | 137          | 0.7 [0.6,0.8]                      |
| <b>By data source used for initial AF diagnosis:</b>               |                   |                      |    |                                        |    |          |    |    |                     |    |    |    |     |              |                                    |
| Secondary care                                                     | 2185              | ○                    | ●  | ●                                      | ●  | ●        | ●  | ●  | ●                   | ●  | ○  | ○  | ○   | 68           | 0.8 [0.6,1.0]                      |
| Primary care                                                       | 2505              | ●                    | ○  | ●                                      | ●  | ●        | ●  | ●  | ●                   | ●  | ○  | ○  | ○   | 69           | 0.6 [0.5,0.7]                      |
| Total                                                              | 4690              | ●                    | ●  | ●                                      | ●  | ●        | ●  | ●  | ●                   | ●  | ○  | ○  | ○   | 137          | 0.7 [0.6,0.8]                      |
| <b>By data source for endpoint:</b>                                |                   |                      |    |                                        |    |          |    |    |                     |    |    |    |     |              |                                    |
| Death register                                                     | 760 <sup>b</sup>  | ●                    | ●  | ●                                      | ●  | ○        | ○  | ●  | ●                   | ●  | ○  | ○  | ○   | 14           | 0.6 [0.4,1.1]                      |
| Primary care                                                       | 4690              | ●                    | ●  | ●                                      | ●  | ○        | ●  | ○  | ●                   | ●  | ○  | ○  | ○   | 106          | 0.5 [0.4,0.6]                      |
| Secondary care                                                     | 4690              | ●                    | ●  | ●                                      | ●  | ●        | ○  | ○  | ●                   | ●  | ○  | ○  | ○   | 90           | 0.4 [0.4,0.5]                      |
| Total                                                              | 4690              | ●                    | ●  | ●                                      | ●  | ●        | ●  | ●  | ●                   | ●  | ○  | ○  | ○   | 137          | 0.7 [0.6,0.8]                      |
| <b>By endpoint definition:</b>                                     |                   |                      |    |                                        |    |          |    |    |                     |    |    |    |     |              |                                    |
| Composite endpoint                                                 | 4690              | ●                    | ●  | ●                                      | ●  | ●        | ●  | ●  | ●                   | ●  | ●  | ●  | ●   | 274          | 1.4 [1.2,1.5]                      |
| Primary endpoint                                                   | 4690              | ●                    | ●  | ●                                      | ●  | ●        | ●  | ●  | ●                   | ●  | ○  | ○  | ○   | 137          | 0.7 [0.6,0.8]                      |
| <b>By use of warfarin:</b>                                         |                   |                      |    |                                        |    |          |    |    |                     |    |    |    |     |              |                                    |
| Without warfarin                                                   | 4629 <sup>c</sup> | ●                    | ●  | ●                                      | ●  | ●        | ●  | ●  | ●                   | ●  | ○  | ○  | ○   | 112          | 0.8 [0.6,0.9]                      |
| With warfarin                                                      | 2549 <sup>c</sup> | ●                    | ●  | ●                                      | ●  | ●        | ●  | ●  | ●                   | ●  | ○  | ○  | ○   | 25           | 0.4 [0.3,0.7]                      |
| Total                                                              | 4690              | ●                    | ●  | ●                                      | ●  | ●        | ●  | ●  | ●                   | ●  | ○  | ○  | ○   | 137          | 0.7 [0.6,0.8]                      |
| <b>By risk score component:</b>                                    |                   |                      |    |                                        |    |          |    |    |                     |    |    |    |     |              |                                    |
| Age 65 to 74                                                       | 1336              | ●                    | ●  | ●                                      | ●  | ●        | ●  | ●  | ●                   | ●  | ○  | ○  | ○   | 68           | 1.2 [0.9,1.5]                      |
| Hypertension                                                       | 3053              | ●                    | ●  | ●                                      | ●  | ●        | ●  | ●  | ●                   | ●  | ○  | ○  | ○   | 66           | 0.5 [0.4,0.6]                      |
| Heart failure                                                      | 126               | ●                    | ●  | ●                                      | ●  | ●        | ●  | ●  | ●                   | ●  | ○  | ○  | ○   | 2            | 0.5 [0.1,1.8]                      |
| Vascular disease                                                   | 110               | ●                    | ●  | ●                                      | ●  | ●        | ●  | ●  | ●                   | ●  | ○  | ○  | ○   | 1            | 0.2 [0.0,1.5]                      |
| Diabetes mellitus                                                  | 65                | ●                    | ●  | ●                                      | ●  | ●        | ●  | ●  | ●                   | ●  | ○  | ○  | ○   | 0            | No events                          |
| Total                                                              | 4690              | ●                    | ●  | ●                                      | ●  | ●        | ●  | ●  | ●                   | ●  | ○  | ○  | ○   | 137          | 0.7 [0.6,0.8]                      |

**Legend**

Abbreviations as per table S6, and DR – death records.

<sup>a</sup> Includes individuals reclassified CHA<sub>2</sub>DS<sub>2</sub>-VASc ≥2 when stroke risk calculated from linked records,

<sup>b</sup> restricted to 760 all-cause deaths during follow-up, <sup>c</sup> individuals could contribute follow-up time to periods with and without warfarin

**Table S9.** Relative risks of ischaemic and haemorrhagic stroke in direct oral anticoagulant trials

| Ref  | Trial                          | Follow-up | Ischaemic stroke                      |                  | Haemorrhagic stroke      |                  |
|------|--------------------------------|-----------|---------------------------------------|------------------|--------------------------|------------------|
|      |                                |           | Definition                            | Relative risk    | Definition               | Relative risk    |
| [12] | <b>RE-LY</b>                   |           |                                       |                  |                          |                  |
|      | Dabigatran 110mg               | 2.0 years | Ischaemic or unspecified stroke       | 1.11 [0.89,1.40] | Haemorrhagic stroke      | 0.31 [0.17,0.56] |
|      | Dabigatran 150mg               | 2.0 years | Ischaemic or unspecified stroke       | 0.76 [0.60,0.98] | Haemorrhagic stroke      | 0.26 [0.14,0.49] |
| [13] | <b>ROCKET AF</b>               |           |                                       |                  |                          |                  |
|      | Rivaroxaban as treated         | 1.9 years | Stroke or systemic                    | 0.79 [0.66,0.96] | Intracranial haemorrhage | 0.67 [0.47,0.93] |
|      | Rivaroxaban intention to treat | 1.9 years | Stroke or systemic                    | 0.88 [0.75,1.03] | Intracranial haemorrhage | 0.67 [0.47,0.93] |
| [14] | <b>ARISTOTLE</b>               |           |                                       |                  |                          |                  |
|      | Apixaban                       | 1.8 years | Ischaemic or uncertain type of stroke | 0.92 [0.74,1.13] | Haemorrhagic stroke      | 0.51 [0.35,0.75] |
| [15] | <b>ENGAGE AF-TIMI 48</b>       |           |                                       |                  |                          |                  |
|      | Edoxaban 30mg                  | 2.8 years | Ischaemic stroke                      | 1.41 [1.19,1.67] | Haemorrhagic stroke      | 0.33 [0.22,0.50] |
|      | Edoxaban 60mg                  | 2.8 years | Ischaemic stroke                      | 1.00 [0.83,1.19] | Haemorrhagic stroke      | 0.54 [0.38,0.77] |

**Table S10.** Net clinical benefit [95% confidence intervals] per 100 person-years of warfarin or direct oral anticoagulants compared to no treatment, by CHA<sub>2</sub>DS<sub>2</sub>-VASC scores, and sex.

|                                            | Total stroke events |                     | Net clinical benefit of oral anticoagulants vs. no treatment |                 |                  |                  |                  |                  |                  |                  |  |
|--------------------------------------------|---------------------|---------------------|--------------------------------------------------------------|-----------------|------------------|------------------|------------------|------------------|------------------|------------------|--|
|                                            | Ischaemic stroke    | Haemorrhagic stroke | Warfarin                                                     | Dabigatran      |                  | Rivaroxaban      |                  | Apixaban         | Edoxaban         |                  |  |
|                                            |                     |                     |                                                              | 110mg           | 150mg            | AT               | ITT              |                  | 30mg             | 60mg             |  |
| <b>CHA<sub>2</sub>DS<sub>2</sub>-VASC:</b> |                     |                     |                                                              |                 |                  |                  |                  |                  |                  |                  |  |
| <b>Overall population</b>                  |                     |                     |                                                              |                 |                  |                  |                  |                  |                  |                  |  |
| 0                                          | 28                  | 8                   | -0.3 [-0.8,0.1]                                              | -0.2 [-0.6,0.1] | 0.0 [-0.3,0.2]   | -0.2 [-0.5,0.1]  | -0.2 [-0.6,0.1]  | -0.2 [-0.5,0.1]  | -0.3 [-0.8,0.1]  | -0.2 [-0.6,0.1]  |  |
| 1                                          | 153                 | 54                  | 0.1 [-0.2,0.4]                                               | 0.4 [0.1,0.6]   | 0.5 [0.3,0.7]    | 0.3 [0.1,0.6]    | 0.3 [0.1,0.5]    | 0.4 [0.1,0.6]    | 0.2 [-0.1,0.5]   | 0.3 [0.1,0.5]    |  |
| 2                                          | 453                 | 95                  | 0.2 [-0.1,0.6]                                               | 0.6 [0.3,0.9]   | 0.9 [0.7,1.1]    | 0.6 [0.4,0.9]    | 0.5 [0.3,0.8]    | 0.6 [0.4,0.9]    | 0.3 [0.0,0.6]    | 0.5 [0.3,0.8]    |  |
| 3                                          | 1013                | 165                 | 1.5 [1.2,1.8]                                                | 1.8 [1.5,2.0]   | 2.2 [1.9,2.4]    | 1.9 [1.6,2.1]    | 1.8 [1.5,2.1]    | 1.8 [1.6,2.1]    | 1.4 [1.1,1.7]    | 1.7 [1.5,2.0]    |  |
| 4                                          | 1673                | 237                 | 2.2 [1.8,2.6]                                                | 2.5 [2.2,2.9]   | 3.2 [2.9,3.4]    | 2.8 [2.5,3.1]    | 2.7 [2.3,3.0]    | 2.7 [2.4,3.0]    | 2.0 [1.6,2.4]    | 2.6 [2.2,2.9]    |  |
| 5                                          | 1416                | 180                 | 3.2 [2.6,3.8]                                                | 3.4 [2.8,4.0]   | 4.6 [4.1,5.1]    | 4.1 [3.6,4.7]    | 3.8 [3.3,4.4]    | 3.9 [3.3,4.4]    | 2.5 [1.8,3.1]    | 3.6 [3.0,4.2]    |  |
| 6                                          | 1360                | 104                 | 7.7 [6.7,8.8]                                                | 8.1 [7.0,9.1]   | 9.6 [8.7,10.5]   | 9.0 [8.0,9.9]    | 8.6 [7.6,9.6]    | 8.6 [7.6,9.6]    | 6.8 [5.6,8.0]    | 8.3 [7.2,9.3]    |  |
| 7                                          | 692                 | 45                  | 7.2 [5.2,9.1]                                                | 7.3 [5.1,9.3]   | 9.8 [8.1,11.6]   | 9.1 [7.4,10.8]   | 8.5 [6.7,10.3]   | 8.4 [6.5,10.2]   | 5.1 [2.6,7.5]    | 7.8 [5.8,9.7]    |  |
| 8                                          | 185                 | 18                  | 12.8 [8.9,16.9]                                              | 13.6 [9.7,17.5] | 15.4 [12.0,19.0] | 14.5 [10.8,18.2] | 14.0 [10.3,17.9] | 14.1 [10.5,18.0] | 12.1 [7.8,16.4]  | 13.7 [10.0,17.6] |  |
| 9                                          | 32                  | 0                   | 16.8 [1.8,31.5]                                              | 16.0 [0.3,31.3] | 18.6 [5.8,32.5]  | 18.4 [5.2,32.4]  | 17.7 [3.6,32.0]  | 17.4 [3.0,31.7]  | 13.7 [-4.3,30.0] | 16.8 [1.8,31.5]  |  |
| <b>0-9</b>                                 | 7005                | 906                 | 1.9 [1.8,2.1]                                                | 2.2 [2.1,2.4]   | 2.9 [2.7,3.0]    | 2.5 [2.4,2.7]    | 2.4 [2.2,2.5]    | 2.4 [2.3,2.6]    | 1.7 [1.5,1.9]    | 2.3 [2.1,2.4]    |  |
| <b>Men</b>                                 |                     |                     |                                                              |                 |                  |                  |                  |                  |                  |                  |  |
| 0                                          | 28                  | 8                   | -0.3 [-0.8,0.1]                                              | -0.1 [-0.6,0.1] | 0.0 [-0.3,0.2]   | -0.2 [-0.5,0.1]  | -0.2 [-0.6,0.1]  | -0.2 [-0.5,0.1]  | -0.3 [-0.8,0.1]  | -0.2 [-0.6,0.1]  |  |
| 1                                          | 137                 | 48                  | 0.1 [-0.2,0.4]                                               | 0.5 [0.1,0.7]   | 0.6 [0.4,0.8]    | 0.4 [0.1,0.6]    | 0.3 [0.1,0.6]    | 0.4 [0.1,0.6]    | 0.3 [-0.1,0.6]   | 0.3 [0.1,0.6]    |  |
| 2                                          | 381                 | 79                  | 0.5 [0.1,0.9]                                                | 1.0 [0.6,1.2]   | 1.2 [0.9,1.5]    | 0.9 [0.6,1.2]    | 0.8 [0.5,1.1]    | 0.9 [0.6,1.2]    | 0.6 [0.2,1.0]    | 0.8 [0.5,1.1]    |  |
| 3                                          | 656                 | 103                 | 1.5 [1.1,1.9]                                                | 2.0 [1.4,2.2]   | 2.3 [1.9,2.6]    | 2.0 [1.6,2.3]    | 1.8 [1.5,2.2]    | 1.9 [1.5,2.3]    | 1.4 [0.9,1.8]    | 1.8 [1.4,2.2]    |  |
| 4                                          | 608                 | 93                  | 2.0 [1.3,2.7]                                                | 2.8 [1.7,3.0]   | 3.2 [2.6,3.7]    | 2.8 [2.2,3.3]    | 2.6 [1.9,3.2]    | 2.6 [2.0,3.2]    | 1.7 [0.9,2.4]    | 2.4 [1.8,3.0]    |  |
| 5                                          | 613                 | 88                  | 3.9 [2.6,4.9]                                                | 5.0 [3.1,5.3]   | 5.7 [4.7,6.7]    | 5.1 [4.1,6.1]    | 4.7 [3.7,5.7]    | 4.8 [3.7,5.8]    | 3.0 [1.6,4.2]    | 4.4 [3.3,5.5]    |  |
| 6                                          | 363                 | 26                  | 7.1 [5.2,9.1]                                                | 8.3 [5.6,9.4]   | 8.9 [7.3,10.7]   | 8.4 [6.6,10.1]   | 8.0 [6.2,9.8]    | 8.0 [6.2,9.8]    | 6.2 [4.0,8.4]    | 7.6 [5.8,9.5]    |  |
| 7                                          | 156                 | 15                  | 8.6 [4.7,13.0]                                               | 10.1 [4.8,13.2] | 11.1 [7.7,15.0]  | 10.4 [6.9,14.3]  | 9.8 [6.2,13.9]   | 9.8 [6.1,13.9]   | 6.9 [2.3,11.6]   | 9.2 [5.4,13.5]   |  |
| 8                                          | 21                  | 3                   | 15.9 [7.0,25.7]                                              | 16.0 [6.4,25.7] | 16.3 [8.0,25.8]  | 16.3 [7.8,25.8]  | 16.1 [7.4,25.8]  | 16.0 [7.3,25.7]  | 15.1 [5.0,25.7]  | 15.9 [7.0,25.7]  |  |
| <b>0-8</b>                                 | 2963                | 463                 | 1.2 [1.0,1.4]                                                | 1.8 [1.3,1.7]   | 2.1 [1.9,2.3]    | 1.8 [1.6,1.9]    | 1.6 [1.4,1.8]    | 1.7 [1.5,1.9]    | 1.0 [0.8,1.3]    | 1.5 [1.3,1.7]    |  |

**Table S10 (continued).** Net clinical benefit [95% confidence intervals] per 100 person-years of warfarin or direct oral anticoagulants compared to no treatment, by CHA<sub>2</sub>DS<sub>2</sub>-VASC scores, and sex.

|                                            | Total stroke events |                     | Net clinical benefit of oral anticoagulants vs. no treatment |                      |                      |                      |                      |                      |                      |                      |
|--------------------------------------------|---------------------|---------------------|--------------------------------------------------------------|----------------------|----------------------|----------------------|----------------------|----------------------|----------------------|----------------------|
|                                            | Ischaemic stroke    | Haemorrhagic stroke | Warfarin                                                     | Dabigatran           |                      | Rivaroxaban          |                      | Apixaban             | Edoxaban             |                      |
|                                            |                     |                     |                                                              | 110mg                | 150mg                | AT                   | ITT                  |                      | 30mg                 | 60mg                 |
| <b>CHA<sub>2</sub>DS<sub>2</sub>-VASC:</b> |                     |                     |                                                              |                      |                      |                      |                      |                      |                      |                      |
| <b>Women</b>                               |                     |                     |                                                              |                      |                      |                      |                      |                      |                      |                      |
| 1                                          | 16                  | 6                   | 0.3 [-0.4,0.8]                                               | 0.3 [-0.5,0.8]       | 0.4 [-0.2,0.8]       | 0.4 [-0.2,0.8]       | 0.3 [-0.3,0.8]       | 0.3 [-0.3,0.8]       | 0.1 [-0.8,0.8]       | 0.3 [-0.4,0.8]       |
| 2                                          | 72                  | 16                  | -0.1 [-0.6,0.3]                                              | 0.3 [-0.2,0.5]       | 0.4 [0.0,0.7]        | 0.1 [-0.2,0.5]       | 0.1 [-0.3,0.5]       | 0.2 [-0.2,0.5]       | 0.0 [-0.5,0.4]       | 0.1 [-0.3,0.5]       |
| 3                                          | 357                 | 62                  | 1.5 [1.1,1.9]                                                | 1.9 [1.4,2.2]        | 2.0 [1.7,2.4]        | 1.8 [1.4,2.2]        | 1.8 [1.4,2.1]        | 1.8 [1.5,2.2]        | 1.6 [1.1,2.0]        | 1.7 [1.4,2.1]        |
| 4                                          | 1065                | 144                 | 2.4 [2.0,2.8]                                                | 3.0 [2.4,3.1]        | 3.3 [2.9,3.6]        | 2.9 [2.6,3.3]        | 2.8 [2.4,3.2]        | 2.9 [2.5,3.2]        | 2.3 [1.9,2.8]        | 2.7 [2.4,3.1]        |
| 5                                          | 803                 | 92                  | 3.1 [2.3,3.8]                                                | 3.7 [2.5,3.9]        | 4.1 [3.6,4.7]        | 3.8 [3.2,4.4]        | 3.6 [2.9,4.2]        | 3.6 [2.9,4.2]        | 2.5 [1.6,3.3]        | 3.4 [2.7,4.0]        |
| 6                                          | 997                 | 78                  | 8.0 [6.6,9.3]                                                | 9.2 [7.0,9.6]        | 9.8 [8.7,11.0]       | 9.2 [8.0,10.4]       | 8.9 [7.6,10.1]       | 8.9 [7.6,10.1]       | 7.0 [5.5,8.5]        | 8.5 [7.2,9.8]        |
| 7                                          | 536                 | 30                  | 6.8 [4.4,9.1]                                                | 8.2 [4.5,9.1]        | 9.4 [7.5,11.4]       | 8.7 [6.7,10.8]       | 8.0 [6.0,10.2]       | 7.9 [5.9,10.1]       | 4.5 [1.8,7.3]        | 7.3 [5.1,9.6]        |
| 8                                          | 164                 | 15                  | 12.4 [7.9,17.3]                                              | 14.3 [8.8,18.0]      | 15.2 [11.4,19.5]     | 14.2 [10.3,18.8]     | 13.7 [9.7,18.4]      | 13.9 [9.8,18.4]      | 11.7 [6.6,16.8]      | 13.4 [9.1,18.0]      |
| 9                                          | 32                  | 0                   | 16.8 [3.1,30.5]                                              | 17.5 [1.5,30.3]      | 18.6 [6.6,31.3]      | 18.4 [6.1,31.2]      | 17.7 [4.8,30.9]      | 17.4 [4.2,30.8]      | 13.7 [-3.9,29.3]     | 16.8 [3.1,30.5]      |
| <b>1-9</b>                                 | <b>4042</b>         | <b>443</b>          | <b>2.7 [2.4,3.0]</b>                                         | <b>3.4 [2.7,3.3]</b> | <b>3.7 [3.5,3.9]</b> | <b>3.4 [3.1,3.6]</b> | <b>3.2 [2.9,3.5]</b> | <b>3.2 [3.0,3.5]</b> | <b>2.4 [2.1,2.7]</b> | <b>3.0 [2.8,3.3]</b> |

**Legend**

AT – as treated, ITT – intention to treat.

## Supplemental references

- 1 Huang D, Anguo L, Yue WS, et al. Refinement of ischemic stroke risk in patients with atrial fibrillation and CHA2 DS2 -VASc score of 1. *Pacing and clinical electrophysiology : PACE* 2014;**37**:1442-7.
- 2 Chao TF, Liu CJ, Wang KL, et al. Should atrial fibrillation patients with 1 additional risk factor of the CHA2DS2-VASc score (beyond sex) receive oral anticoagulation? *Journal of the American College of Cardiology* 2015;**65**:635-42.
- 3 Olesen JB, Lip GY, Hansen ML, et al. Validation of risk stratification schemes for predicting stroke and thromboembolism in patients with atrial fibrillation: nationwide cohort study. *BMJ (Clinical research ed)* 2011;**342**:d124.
- 4 Olesen JB, Torp-Pedersen C, Hansen ML, et al. The value of the CHA2DS2-VASc score for refining stroke risk stratification in patients with atrial fibrillation with a CHADS2 score 0-1: a nationwide cohort study. *Thrombosis and haemostasis* 2012;**107**:1172-9.
- 5 Olesen JB, Lip GY, Lindhardsen J, et al. Risks of thromboembolism and bleeding with thromboprophylaxis in patients with atrial fibrillation: A net clinical benefit analysis using a 'real world' nationwide cohort study. *Thrombosis and haemostasis* 2011;**106**:739-49.
- 6 Lip GY, Skjoth F, Rasmussen LH, et al. Oral anticoagulation, aspirin, or no therapy in patients with nonvalvular AF with 0 or 1 stroke risk factor based on the CHA2DS2-VASc score. *Journal of the American College of Cardiology* 2015;**65**:1385-94.
- 7 Friberg L, Rosenqvist M, Lip GY. Evaluation of risk stratification schemes for ischaemic stroke and bleeding in 182 678 patients with atrial fibrillation: the Swedish Atrial Fibrillation cohort study. *European heart journal* 2012;**33**:1500-10.
- 8 Guo Y, Apostolakis S, Blann AD, et al. Validation of contemporary stroke and bleeding risk stratification scores in non-anticoagulated Chinese patients with atrial fibrillation. *International journal of cardiology* 2013;**168**:904-9.
- 9 Lip GY, Nieuwlaat R, Pisters R, et al. Refining clinical risk stratification for predicting stroke and thromboembolism in atrial fibrillation using a novel risk factor-based approach: the euro heart survey on atrial fibrillation. *Chest* 2010;**137**:263-72.
- 10 Friberg L, Skeppholm M, Terent A. Benefit of anticoagulation unlikely in patients with atrial fibrillation and a CHA2DS2-VASc score of 1. *Journal of the American College of Cardiology* 2015;**65**:225-32.
- 11 Forslund T, Wettermark B, Wandell P, et al. Risks for stroke and bleeding with warfarin or aspirin treatment in patients with atrial fibrillation at different CHA(2)DS(2)VASc scores: experience from the Stockholm region. *European journal of clinical pharmacology* 2014;**70**:1477-85.
- 12 Connolly SJ, Ezekowitz MD, Yusuf S, et al. Dabigatran versus warfarin in patients with atrial fibrillation. *The New England journal of medicine* 2009;**361**:1139-51.
- 13 Patel MR, Mahaffey KW, Garg J, et al. Rivaroxaban versus warfarin in nonvalvular atrial fibrillation. *The New England journal of medicine* 2011;**365**:883-91.
- 14 Granger CB, Alexander JH, McMurray JJ, et al. Apixaban versus warfarin in patients with atrial fibrillation. *The New England journal of medicine* 2011;**365**:981-92.
- 15 Giugliano RP, Ruff CT, Braunwald E, et al. Edoxaban versus warfarin in patients with atrial fibrillation. *The New England journal of medicine* 2013;**369**:2093-104.
